# Supplementary material
Source: Springer Nature journal article supplement (https://www.springermedizin.de/resource/supplementary/12889_2012_4610_MOESM1_ESM.pdf/9492918)
Supplement: MOESM1 [file 9492918]

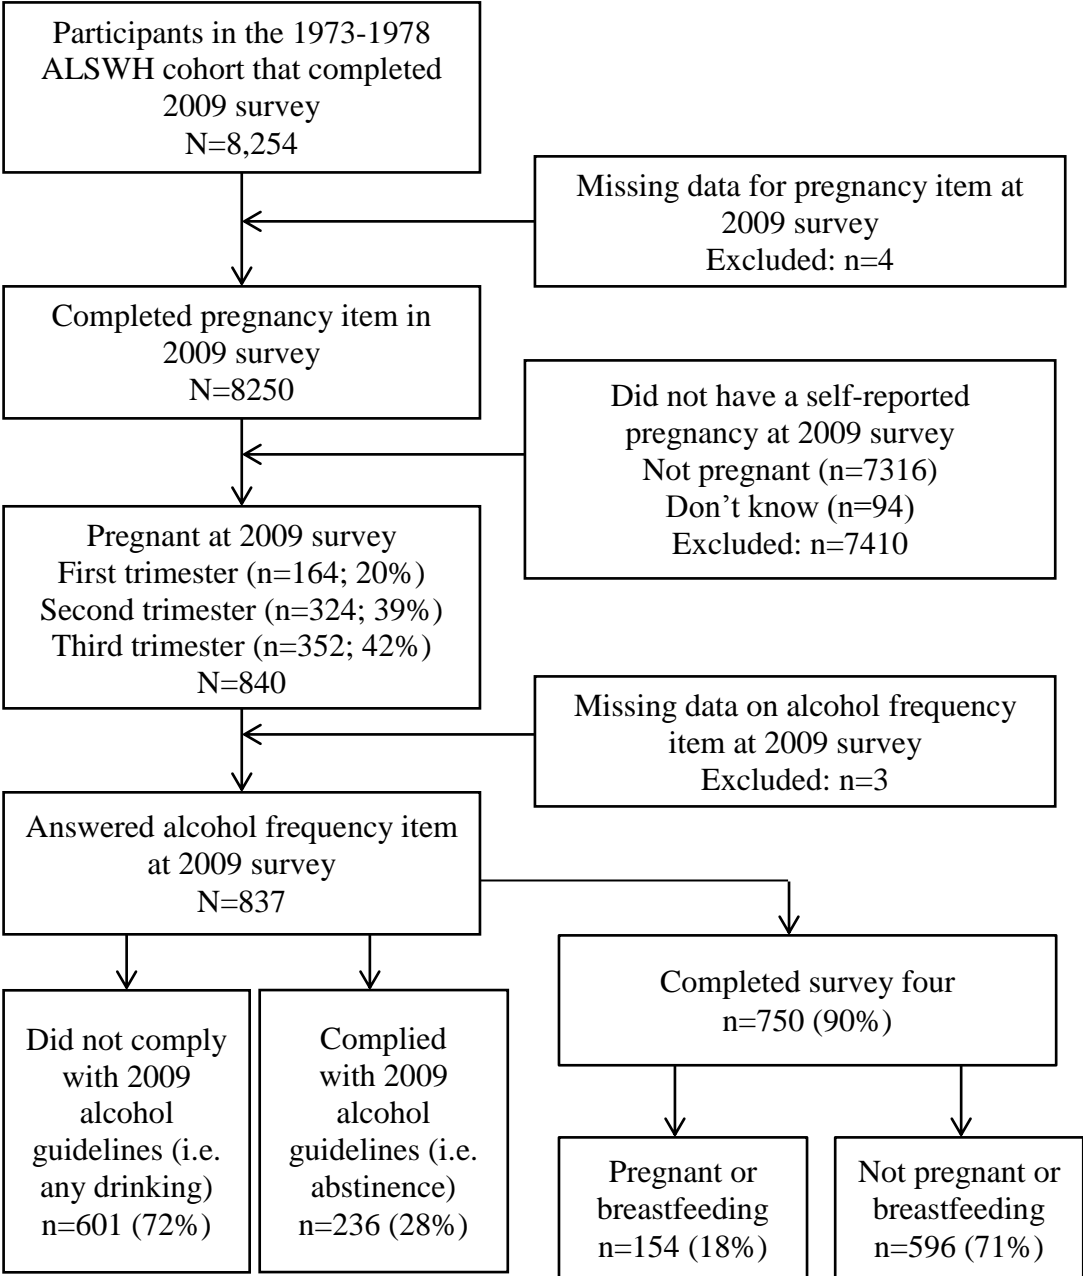

Participants in the 1973-1978  
ALSWH cohort that completed  
2009 survey  
N=8,254

Missing data for pregnancy item at  
2009 survey  
Excluded: n=4

Completed pregnancy item in  
2009 survey  
N=8250

Did not have a self-reported  
pregnancy at 2009 survey  
Not pregnant (n=7316)  
Don't know (n=94)  
Excluded: n=7410

Pregnant at 2009 survey  
First trimester (n=164; 20%)  
Second trimester (n=324; 39%)  
Third trimester (n=352; 42%)  
N=840

Missing data on alcohol frequency  
item at 2009 survey  
Excluded: n=3

Answered alcohol frequency item  
at 2009 survey  
N=837

Did not comply  
with 2009  
alcohol  
guidelines (i.e.  
any drinking)  
n=601 (72%)

Complied  
with 2009  
alcohol  
guidelines (i.e.  
abstinence)  
n=236 (28%)

Completed survey four  
n=750 (90%)

Pregnant or  
breastfeeding  
n=154 (18%)

Not pregnant or  
breastfeeding  
n=596 (71%)
